# Supplementary material
Source: PubMed Central journal article supplement (PMC3395072)
Supplement: NIHMS159540-supplement-Suppl6.pdf [file NIHMS159540-supplement-Suppl6.pdf]

Top 20 Enriched Gene Sets for P0 MGN

| NAME                                 | SIZE | ES      | NES     | NOM p-val | FDR q-val | FWER p-val |
|--------------------------------------|------|---------|---------|-----------|-----------|------------|
| HSA05010_ALZHEIMERS_DISEASE          | 25   | -0.5686 | -1.9666 | 0         | 0.02      | 0          |
| TSA_HEPATOMA_CANCER_UP               | 37   | -0.6275 | -1.8803 | 0         | 0.066727  | 0.099      |
| LEE_MYC_E2F1_UP                      | 47   | -0.606  | -1.8373 | 0         | 0.057243  | 0.117      |
| ET743_HELA_UP                        | 53   | -0.5469 | -1.8248 | 0         | 0.053958  | 0.135      |
| ADIP_DIFF_CLUSTER1                   | 53   | -0.5371 | -1.8203 | 0         | 0.051987  | 0.135      |
| PASSERINI_GROWTH                     | 32   | -0.6009 | -1.797  | 0         | 0.05517   | 0.162      |
| 5FU_RESIST_GASTRIC_DN                | 15   | -0.6513 | -1.7785 | 0         | 0.057444  | 0.203      |
| IRITANI_ADPROX_VASC                  | 134  | -0.4506 | -1.7678 | 0         | 0.054215  | 0.216      |
| HSA00530_AMINOSUGARS_METABOLISM      | 25   | -0.463  | -1.7559 | 0         | 0.054678  | 0.228      |
| APPEL_IMATINIB_UP                    | 31   | -0.5416 | -1.753  | 0.01636   | 0.057212  | 0.246      |
| GATA3PATHWAY                         | 15   | -0.665  | -1.7496 | 0         | 0.057462  | 0.264      |
| RETT_UP                              | 32   | -0.4673 | -1.7468 | 0         | 0.056349  | 0.264      |
| TPA_RESIST_EARLY_UP                  | 26   | -0.5862 | -1.7434 | 0         | 0.057579  | 0.288      |
| NADLER_OBESITY_UP                    | 54   | -0.4664 | -1.7431 | 0         | 0.054894  | 0.288      |
| CMV_HCMV_TIMECOURSE_24HRS_DN         | 36   | -0.5566 | -1.7173 | 0         | 0.059403  | 0.347      |
| LEI_HOXC8_DN                         | 17   | -0.7692 | -1.709  | 0         | 0.064676  | 0.37       |
| POMEROY_DESMOPLASIC_VS_CLASSIC_MD_DN | 36   | -0.5051 | -1.7064 | 0         | 0.062674  | 0.37       |
| HOFMANN_MDS_CD34_LOW_AND_HIGH_RISK   | 36   | -0.4757 | -1.6926 | 0         | 0.07756   | 0.418      |
| VEGF_MMMEC_12HRS_UP                  | 27   | -0.6553 | -1.6911 | 0         | 0.075201  | 0.418      |
