# Supplementary material
Source: PubMed Central journal article supplement (PMC3395072)
Supplement: NIHMS159540-supplement-Suppl10.pdf [file NIHMS159540-supplement-Suppl10.pdf]

## Top 20 Downregulated Gene Sets for P5 rwMGN

| NAME                               | SIZE | ES      | NES      | NOM p-val | FDR q-val | FWER p-val |
|------------------------------------|------|---------|----------|-----------|-----------|------------|
| NFKBPATHWAY                        | 23   | 0.51477 | 1.525717 | 0         | 1         | 0.91       |
| ASTIER_FN_DIFF                     | 52   | 0.27873 | 1.503993 | 0         | 1         | 0.946      |
| ASTIER_BCELL                       | 51   | 0.26972 | 1.481648 | 0         | 1         | 0.946      |
| FALT_BCLL_UP                       | 37   | 0.39972 | 1.332901 | 0         | 1         | 1          |
| CMV_HCMV_TIMECOURSE_14HRS_DN       | 34   | 0.33759 | 1.320187 | 0.110883  | 1         | 1          |
| HSA04930_TYPE_II_DIABETES_MELLITUS | 41   | 0.38516 | 1.311868 | 0.1       | 1         | 1          |
| HSA04742_TASTE_TRANSDUCTION        | 26   | 0.40352 | 1.278951 | 0.104938  | 1         | 1          |
| HSA04310_WNT_SIGNALING_PATHWAY     | 137  | 0.23798 | 1.25605  | 0         | 1         | 1          |
| CELLCYCLEPATHWAY                   | 21   | 0.30326 | 1.251048 | 0.10119   | 1         | 1          |
| HUMAN_TISSUE_PANCREAS              | 31   | 0.41914 | 1.209177 | 0.227642  | 1         | 1          |
| NOUZOVA_CPG_METHLTD                | 48   | 0.26657 | 1.197118 | 0         | 1         | 1          |
| VERNELL_PRB_CLSTR2                 | 17   | 0.42241 | 1.162737 | 0.17773   | 1         | 1          |
| TAKEDA_NUP8_HOXA9_6H_DN            | 35   | 0.38585 | 1.141964 | 0.336016  | 1         | 1          |
| HSA05217_BASAL_CELL_CARCINOMA      | 54   | 0.34107 | 1.136774 | 0.323108  | 1         | 1          |
| CANCERDRUGS_PROBCELL_UP            | 19   | 0.3686  | 1.11091  | 0.206897  | 1         | 1          |
| ST_JNK_MAPK_PATHWAY                | 38   | 0.31233 | 1.095413 | 0.186235  | 1         | 1          |
| UVC_HIGH_ALL_UP                    | 16   | 0.3942  | 1.095124 | 0.40873   | 1         | 1          |
| STANELLE_E2F1_UP                   | 25   | 0.30069 | 1.094072 | 0.322     | 1         | 1          |
| BADPATHWAY                         | 20   | 0.35335 | 1.093088 | 0.30042   | 1         | 1          |
